# Supplementary material
Source: publisher figshare collection journal article supplement (https://karger.figshare.com/ndownloader/files/22292712)
Supplement: Supplementary file 1 [file 22292712]

**SUPPLEMENTARY DATA**

**Study Protocol**

Routine hydration was performed with 1 ml/kg/h of normal (0.9%) saline for 18–24 h before PCI and 18 to 24 h post procedure. All patients underwent an echocardiographic evaluation pre-procedure. Left ventricular ejection fraction (LVEF) was assessed using the Simpson’s method. In patients with reduced LVEF (≤40%), presence of significant valvular disease or overt heart failure upon presentation, the hydration rate was reduced to 0.5 ml/kg/h. Special care was given regarding metformin use. The use of N-acetylcysteine, sodium bicarbonate, platelet glycoprotein IIb/IIIa receptor inhibitors, and the indication to intra-aortic balloon pump (IABP) or intravenous inotropic support, was left to the discretion of the interventional cardiologists according to our institution clinical protocols.

Serum creatinine concentration for every patient was routinely measured at the time of admission and at 48 to 72 hours post procedure. Furthermore, procedural details for every patient (i.e., diseased coronary vessels, treated coronary vessels, contrast dose, procedure duration, number of stents employed) were recorded. A non-ionic, low-osmolarity contrast agent, ioversol (Optiray 350 mg iodine/ml, Mallinckrodt Medical Imaging, Ireland) was used for all procedures.

**Definitions**

The creatinine clearance / glomerular filtration rate (GFR) was estimated using the Modification of Diet in Renal Disease (MDRD) GFR Equation: 186 × Serum Cr-1.154 × age-0.203 × 1.212 (if patient is black) × 0.742 (if female) (1). In addition, in each patient a transthoracic echocardiography study was performed for all patients during hospitalization using standard techniques, in which left ventricular ejection fraction was assessed (Simpson’s method) (2). Renal function was then categorized according to the stages set by the National Kidney Foundation with creatinine clearance ≥90 ml/min considered normal, 60–89 ml/min considered mildly impaired, and <60 ml/min considered at least moderately impaired (3).

**Supplementary Table 1.** Definitions of Clinical Terms Used.

| **Clinical Term** | **Definition criteria** |
| --- | --- |
| Urgent / Emergent Procedure (4) | Primary or rescue PCI (in the case of unsuccessful fibrinolysis or within 2–24 h after bolus administration) in STEMI patients.  Immediate (<2 hours), early invasive (<24 hours) or invasive (<72 hours) strategy for NSTEMI / UA patients. |
| Previous renal disease | Defined as at least one of the following: history of or previous admission for renal artery stenosis; acute renal failure; acute or chronic glomerulonephritis; renal obstruction; overt hematuria, nephrotic syndrome; nephrectomy; reduced renal function at baseline (defined by serum creatinine levels ≥ 2.5mg/dl or calculated GFR <30 ml/min); history of kidney transplantation. |
| Hypertension | Defined as systolic blood pressure >140 mmHg and/or diastolic blood pressure >90 mmHg or prior use of anti-hypertension medication. |
| Diabetes mellitus | Defined as fasting glucose >126 mg/dL and/or HbA1c > 6.5% or prior use of anti-diabetic medication. |
| Peripheral vascular disease | Presence of poorly palpable pulses; claudication; arterial bruits; previous vascular surgery; aortic aneurysm; verified atherosclerotic lesions causing stenosis ≥50% in major peripheral arteries. |
| History of / Previous MI | Documented in patients records as MI during the last 5 years or evidence of previous event on ECG or imaging. |
| Hypotension | Systolic Blood Pressure ≤90mmHg (for Chen et al, Fu et al), or <80mmHg (for Mehran et al), or <80 mm Hg for at least 1 hour requiring inotropic support within 24 hours peri-procedurally (for Victor et al). |
| Chronic heart failure (5) | Determined by the presence of marked limitation or inability to carry out any physical activity without discomfort (NYHA class II–IV), by chest radiography showing an enlarged cardiac silhouette, by a left ventricular ejection fraction ≤50% on echocardiography (Simpson's method) and/or by an impaired left ventricular filling. |
| History of / Previous PCI | Documented in patient records as PCI during the last 5 years (for Tziakas et al) or one recent procedure within the past 72h (for Maioli et al). |
| Anemia | Hematocrit value <39% for men and <36% for women (for Chen et al and Mehran et al), or hemoglobin value <11 g/dL (for Fu et al). |
| Cardiogenic Shock (6) | At least one of the following: (i) need for cardiopulmonary resuscitation; (ii) systolic blood pressure <90 mmHg for at least 15 minutes, or drop of systolic blood pressure by at least 40 mmHg for at least 15 minutes, with signs of end-organ hypoperfusion (cold extremities, or urinary output <30 mL/h, or mental confusion); (iii) need for catecholamines (except for dopamine at a rate of <5 μg kg−1 min−1) or ballon counter-pulsation to maintain adequate organ perfusion and a systolic blood pressure of >90 mmHg. |
| Coronary Artery Disease indication | Symptom unlikely to be ischemic, no symptom, no angina, stable angina, unstable angina, NSTEMI, STEMI or equivalent (for Gurm et al), or acute myocardial infarction (for Gao et al). |
| Anterior myocardial infarction | Defined by ischemic changes (ST segment elevation / depression or T-wave changes (hyperacute, new inversion, new flat, or pseudo-normalization of T waves) in V1-V4 precordial leads on ECG. |
| Diabetic Microangiopathy (7) | Considered to be present when either diabetic retinopathy, diabetic neuropathy or diabetic foot diagnosis was present in patient’s medical history. |
| Albuminuria (8) | Considered to be present when a urine dipstick test was positive for protein at a value of ≥+1. |

ECG, electrocardiogram; MI, myocardial infarction; NSTEMI, non ST-elevation myocardial infarction; NYHA, New York Heart Association; PCI, percutaneous coronary intervention; STEMI, ST-elevation myocardial infarction

**References**

1. Levey AS, Bosch JP, Lewis JB, Greene T, Rogers N, Roth D. A more accurate method to estimate glomerular filtration rate from serum creatinine: a new prediction equation. Modification of Diet in Renal Disease Study Group. Ann Intern Med. 1999;130:461-70.

2. Feigenbaum H, Armstrong WF, Ryan T. Evaluation of systolic and diastolic function of the left ventricle. In: Feigenbaum H, editor. Feigenbaum’s Echocardiography. 6th ed. Philadelphia: Lippincott Williams & Wilkins, 2005:138-79.

3. Levey AS, Coresh J, Balk E, Kausz AT, Levin A, Steffes MW, Hogg RJ, Perrone RD, Lau J, Eknoyan G; National Kidney Foundation practice guidelines for chronic kidney disease: evaluation, classification, and stratification. Ann Intern Med 2003; 139:137-47.

4.Neumann FJ, Sousa-Uva M, Ahlsson A, Alfonso F, Banning AP, Benedetto U, Byrne RA, Collet JP, Falk V, Head SJ, Jüni P, Kastrati A, Koller A, Kristensen SD, Niebauer J, Richter DJ, Seferovic PM, Sibbing D, Stefanini GG, Windecker S, Yadav R, Zembala MO; ESC Scientific Document Group. 2018 ESC/EACTS Guidelines on myocardial revascularization. Eur Heart J. 2018 Aug 25. doi: 10.1093/eurheartj/ehy394. [Epub ahead of print]

5. Ponikowski P, Voors AA, Anker SD, Bueno H, Cleland JGF, Coats AJS, Falk V, González-Juanatey JR, Harjola VP, Jankowska EA, Jessup M, Linde C, Nihoyannopoulos P, Parissis JT, Pieske B, Riley JP, Rosano GMC, Ruilope LM, Ruschitzka F, Rutten FH, van der Meer P; ESC Scientific Document Group. 2016 ESC Guidelines for the diagnosis and treatment of acute and chronic heart failure: The Task Force for the diagnosis and treatment of acute and chronic heart failure of the European Society of Cardiology (ESC)Developed with the special contribution of the Heart Failure Association (HFA) of the ESC. Eur Heart J. 2016;37:2129-200.

6. The PEITHO Steering Committee. Single-bolus tenecteplase plus heparin compared with heparin alone for normotensive patients with acute pulmonary embolism who have evidence of right ventricular dysfunction and myocardial injury: rationale and design of the Pulmonary Embolism Thrombolysis (PEITHO) trial. Am Heart J 2012;163:33–8.

7. American Diabetes Association. 10. Microvascular complications and foot care: Standards of Medical Care in Diabetes—2018. Diabetes Care 2018;41(Suppl. 1):S105–S118

8. Tuttle KR, Bakris GL, Bilous RW, Chiang JL, de Boer IH, Goldstein-Fuchs J, Hirsch IB, Kalantar-Zadeh K, Narva AS, Navaneethan SD, Neumiller JJ, Patel UD, Ratner RE, Whaley-Connell AT, Molitch ME. Diabetic kidney disease: a report from an ADA Consensus Conference. Diabetes Care. 2014 ;37:2864-83.

**Risk scores**

The following CI-AKI risk score models (characterized by internal or external validation in the original publication) were assessed in the present study. We calculated the risk scores of 17 different CI-AKI prediction models (McCullough et al, 1997; Bartholomew et al, 2004; Marenzi et al, 2004; Mehran et al, 2004; Ghani et al, 2009; Maioli et al, 2010; Fu et al, 2012; Gurm et al, 2013; Tziakas et al, 2013; Andò et al, 2013; Chen et al, 2014; Victor et al, 2014; Gao et al, 2014; Tsai et al, 2014; Liu et al, 2015; Brown et al, 2015; and Caspi et al; 2017). Independent variables included in the 17 different predictive models for CI-AKI are presented in the following Table (**Supplementary Table 2**).

|  |  |  | CI-AKI prediction model | | | | | | | | | | | | | | | | | | | | | | | | | | |  |
| --- | --- | --- | --- | --- | --- | --- | --- | --- | --- | --- | --- | --- | --- | --- | --- | --- | --- | --- | --- | --- | --- | --- | --- | --- | --- | --- | --- | --- | --- | --- |
| **Variable** | McCullough  1997 | Bartholemew  2004 | | Marenzi  2004 | Mehran  2004 | Ghani  2009 | Maioli  2010 | Fu  2012 | Gurm  2013 | | Tziakas  2013 | | Ando  2013 | | Chen 2014 | | Victor  2014 | | Gao  2014 | | Tsai  2014 | | Liu  2015 | | Brown  2015 | | Caspi  2017 | | **# present** |  |
| No of Predictors | 3 | 8 | | 5 | 8 | 5 | 7 | 9 | 15 | | 5 | | 3 | | 9 | | 7 | | 7 | | 11 | | 3 | | 15 | | 7 | |  |  |
| **Demographic** | | | | | | | | | | | | | | | | | | | | | | | | | | | | | | |
| Age |  |  | | **√** | **√** |  | **√** | **√** | **√** |  | | **√** | | **√** | |  | | **√** | | **√** | | **√** | | **√** | | **√** | | 12 | |  |
| Female sex |  |  | |  |  | **√** |  |  |  |  | |  | |  | |  | |  | |  | |  | |  | |  | | 1 | |  |
| Race |  |  | |  |  |  |  |  |  |  | |  | |  | |  | |  | |  | |  | | **√** | |  | | 1 | |  |
| **Anthropometric data** | | | | | | | | | | | | | | | | | | | | | | | | | | | | | | |
| Height |  |  | |  |  |  |  |  | **√** |  | |  | |  | |  | |  | |  | |  | |  | |  | | 1 | |  |
| Weight |  |  | |  |  |  |  |  | **√** |  | |  | |  | |  | |  | |  | |  | |  | |  | | 1 | |  |
| **Medical history** | | | | | | | | | | | | | | | | | | | | | | | | | | | | | | |
| Impaired renal function | **√** | **√** | |  | **√** | **√** | **√** | **√** | **√** | **√** | |  | | **√** | | **√** | | **√** | | **√** | | **√** | | **√** | | **√** | | 15 | |  |
| Anemia |  |  | |  | **√** |  |  | **√** |  |  | |  | | **√** | |  | |  | | **√** | |  | | **√** | |  | | 5 | |  |
| Diabetes mellitus | **√** | **√** | |  | **√** | **√** | **√** | **√** | **√** |  | |  | | **√** | | **√** | |  | | **√** | |  | | **√** | | **√** | | 12 | |  |
| Hypertension |  | **√** | |  |  |  |  |  |  |  | |  | |  | |  | | **√** | |  | |  | | **√** | |  | | 3 | |  |
| Heart failure |  | **√** | |  | **√** |  |  |  | **√** |  | |  | |  | |  | | **√** | | **√** | |  | | **√** | |  | | 6 | |  |
| Impaired LVEF |  |  | |  |  |  | **√** | **√** |  |  | | **√** | | **√** | |  | |  | |  | | **√** | | **√** | | **√** | | 7 | |  |
| Previous MI |  |  | |  |  |  |  | **√** |  |  | |  | | **√** | |  | | **√** | |  | |  | |  | |  | | 3 | |  |
| Recent cardiac procedure/PCI |  |  | |  |  |  | **√** |  |  | **√** | |  | |  | |  | |  | |  | |  | | **√** | |  | | 3 | |  |
| Peripheral vascular disease |  | **√** | |  |  |  |  |  |  | **√** | |  | |  | | **√** | |  | |  | |  | | **√** | |  | | 4 | |  |
| Metformin use |  |  | |  |  |  |  |  |  | **√** | |  | |  | |  | |  | |  | |  | |  | |  | | 1 | |  |
| Stroke |  |  | |  |  |  |  |  |  |  | |  | |  | |  | |  | | **√** | |  | |  | |  | | 1 | |  |
| Smoking |  |  | |  |  |  |  |  |  |  | |  | |  | |  | |  | |  | |  | | **√** | |  | | 1 | |  |
| **Physical examination/ clinical presentation** | | | | | | | | | | | | | | | | | | | | | | | | | | | | | | |
| Cardiac arrest |  |  | |  |  |  |  |  |  |  | |  | |  | |  | |  | | **√** | |  | |  | |  | | 1 | |  |
| Hypotension |  |  | |  | **√** |  |  | **√** |  |  | |  | | **√** | | **√** | |  | |  | |  | |  | |  | | 4 | |  |
| Shock |  |  | |  |  | **√** |  |  | **√** |  | |  | |  | |  | |  | | **√** | |  | | **√** | |  | | 4 | |  |
| CAD presentation |  |  | |  |  |  |  |  | **√** |  | |  | |  | |  | |  | | **√** | |  | | **√** | |  | | 3 | |  |
| Use of IABP |  | **√** | | **√** | **√** |  |  |  |  |  | |  | |  | |  | | **√** | | **√** | |  | |  | |  | | 5 | |  |
| Anterior MI |  |  | | **√** |  |  |  |  |  |  | |  | |  | |  | |  | |  | |  | |  | | **√** | | 2 | |  |
| Time to reperfusion |  |  | | **√** |  |  |  |  |  |  | |  | |  | |  | |  | |  | |  | |  | |  | | 1 | |  |
| Procedure Urgent/emergent |  | **√** | |  |  |  |  | **√** | **√** |  | |  | | **√** | |  | |  | |  | |  | | **√** | |  | | 5 | |  |
| PCI indication |  |  | |  |  |  |  |  | **√** |  | |  | |  | |  | |  | |  | |  | |  | |  | | 1 | |  |
| Contrast volume | **√** | **√** | | **√** | **√** |  |  | **√** |  | **√** | |  | |  | | **√** | | **√** | |  | |  | |  | |  | | 8 | |  |
| Multivessel PCI |  |  | |  |  | **√** |  |  |  |  | |  | |  | |  | |  | |  | |  | |  | |  | | 1 | |  |
| One procedure in past 72 h |  |  | |  |  |  | **√** |  |  |  | |  | |  | |  | |  | |  | |  | |  | |  | | 1 | |  |
| Killip class |  |  | |  |  |  |  |  |  |  | |  | |  | |  | |  | | **√** | |  | |  | | **√** | | 2 | |  |
| Diuretic therapy |  |  | |  |  |  |  |  |  |  | |  | |  | |  | |  | |  | |  | |  | | **√** | | 1 | |  |
| **Laboratory values at presentation** | | | | | | | | | | | | | | | | | | | | | | | | | | | | | | |
| Albuminuria |  |  | |  |  |  |  |  |  |  | |  | |  | | **√** | |  | |  | |  | |  | |  | | 1 | |  |
| Pre-procedure Cr >baseline Cr |  |  | |  |  |  | **√** |  |  |  | | **√** | |  | |  | |  | |  | |  | |  | |  | | 2 | |  |
| HDL<1 mmol/L (≈40 mg/dl) |  |  | |  |  |  |  |  | **√** |  | |  | | **√** | |  | |  | |  | |  | |  | |  | | 2 | |  |
| CK-MB |  |  | |  |  |  |  |  | **√** |  | |  | |  | |  | |  | |  | |  | |  | |  | | 1 | |  |
| Hemoglobin |  |  | |  |  |  |  |  | **√** |  | |  | |  | | **√** | |  | |  | |  | |  | |  | | 2 | |  |
| Troponin I |  |  | |  |  |  |  |  | **√** |  | |  | |  | |  | |  | |  | |  | |  | |  | | 1 | |  |
| Troponin T |  |  | |  |  |  |  |  | **√** |  | |  | |  | |  | |  | |  | |  | |  | |  | | 1 | |  |

**Supplementary Table 2.** Individualpredictors included in published prognostic models for contrast induced acute kidney injury.

√ , variable included in each model; CAD, coronary artery disease; CK-MB, creatine kinase isoenzyme-MB; Cr, creatinine; HDL, high density lipoprotein; h, hours; IABP, intra-aortic balloon pump; LVEF, left ventricular ejection fraction; MI, myocardial infarction; PCI, percutaneous coronary intervention

Adapted from Silver SA, Shah PM, Chertow GM, Harel S, Wald R, Harel Z. Risk prediction models for contrast induced nephropathy: systematic review. BMJ. 2015 Aug 27;351:h4395.

**Supplementary Table 3.** Model performance.

| **Model** |  | **Overall Performance** | | **Discrimination** | | | | | | | **Model fit** | | | **Calibration** | |
| --- | --- | --- | --- | --- | --- | --- | --- | --- | --- | --- | --- | --- | --- | --- | --- |
|  | Youden Index | Negative predictive value (%) | Positive predictive value (%) | Observed  events, n (%) | Predicted  events, n (%) | Absolute difference | Discordance ratio | C-statistic | Discrimination slope | overall chi-square | | -2LL | H-L statistic | | Calibration slope |
| **Liberal CI-AKI criterion (an increase of ≥25% or ≥0.5 mg/dl in pre-PCI serum creatinine at 48 h to 72 h post PCI)** | | | | | | | | | | | | | | | |
| **Brown, et al** | 10.3 | 85.1 | 18.8 | 206 (16.5) | 521 (41.7) | 25.2 | 1.5 | 0.516 (0.473-0.558) | 0.496 | 0.617 | | 1117.2 | 9.35; 0.314 | | 0.391 |
| **Tsai, et al** | 9 | 84.7 | 22.8 | 206 (16.5) | 1047 (83.9) | 67.4 | 4.1 | 0.513 (0.485 –0.541) | 0.204 | 0.244 | | 1117.5 | 17.07;0.029 | | 0.254 |
| **Gurm, et al** | 0.9 | 85.8 | 19.1 | 206 (16.5) | 624 (50) | 33.5 | 2 | 0.543 (0.514 –0.570) | 0.117 | 0.140 | | 1117.6 | 11.76;0.162 | | 0.106 |
| **Caspi, et al** | 4 | 85.6 | 18.8 | 206 (16.5) | 670 (53.7) | 37.2 | 2.3 | 0.533 (0.505-0.561) | 0.857 | 1.116 | | 1116.6 | 3.16; 0.531 | | 0.993 |
| **Victor, et al** | 1 | 85.2 | 20.5 | 206 (16.5) | 370 (29.7) | 13.2 | 0.8 | 0.543 (0.499-0.586) | 0.367 | 4.413 | | 1113.3 | 3.72; 0.156 | | 0.975 |
| **Maioli, et al** | 3 | 85.7 | 30.2 | 206 (16.5) | 172 (13.8) | -2.7 | -0.2 | 0.583 (0.555–0.610) | 1.467 | 17.197 | | 1100.5 | 6.05; 0.109 | | 0.965 |
| **Marenzi, et al** | 1 | 85.9 | 18.8 | 206 (16.5) | 650 (52.1) | 35.6 | 2.2 | 0.549 (0.506-0.592) | 0.578 | 6.905 | | 1110.9 | 0.13; 0.938 | | 0.999 |
| **Liu, et al** | 0 | 84.5 | 19.1 | 206 (16.5) | 367 (29.4) | 12.9 | 0.8 | 0.522 (0.479-0.565) | 0.04 | 0.057 | | 1117.7 | 7.19; 0.007 | | 0.987 |
| **Gao, et al** | 5 | 84.8 | 18.2 | 206 (16.5) | 929 (74.5) | 58 | 3.5 | 0.486 (0.445-0.527) | 0.168 | 0.222 | | 1117.6 | 9.04; 0.171 | | 0.935 |
| **Fu, et al** | 11 | 94 | 17.1 | 206 (16.5) | 90 (7.2) | -9.3 | -0.6 | 0.498 (0.455-0.541) | 0.052 | 0.069 | | 1117.7 | 1.08; 0.956 | | 0.993 |
| **Chen, et al** | 4 | 84.8 | 21.5 | 206 (16.5) | 1057 (84.7) | 68.2 | 4.1 | 0.478 (0.434 –0.522) | 0.897 | 1.096 | | 1116.7 | 19.81; 0.011 | | 0.745 |
| **Ghani, et al** | 2 | 84 | 20.1 | 206 (16.5) | 169 (13.6) | -2.9 | -0.2 | 0.510 (0.466- 0.554) | 0.219 | 0.271 | | 1117.5 | 1.36; 0.244 | | 0.990 |
| **Bartholomew, et al** | 3 | 85.7 | 17 | 206 (16.5) | 210 (16.8) | 0.3 | 0.02 | 0.493 (0.451-0.535) | 0.129 | 0.168 | | 1117.6 | 2.37; 0.668 | | 0.995 |
| **Mehran, et al** | 12 | 84.6 | 18.9 | 206 (16.5) | 403 (32.3) | 15.8 | 0.9 | 0.526 (0.484-0.569) | 0.049 | 0.635 | | 1117.1 | 2.98; 0.886 | | 0.960 |
| **Tziakas, et al** | 1 | 83.9 | 17.5 | 206 (16.5) | 378 (30.3) | 13.8 | 0.8 | 0.502 (0.459-0.545) | 0.006 | 0.085 | | 1117.7 | 3.147; 0.369 | | 0.990 |
| **Ando, et al** | 1.1 | 85.4 | 20 | 206 (16.5) | 439 (35.2) | 18.7 | 1.1 | 0.542 (0.498-0.585) | 0.006 | 6.693 | | 1111.1 | 15.68; 0.047 | | 0.615 |
| **McCullough et al** | 80.5 | 88.1 | 20.4 | 206 (16.5) | 678 (54) | 37.9 | 2.3 | 0.581 (0.539 –0.622) | 0.009 | 11.207 | | 1106.6 | 6.406;0.602 | | 0.902 |
|  |  |  |  |  |  |  |  |  |  |  | |  |  | |  |
| **Strict CI-AKI criterion (an increase of ≥0.5 mg/dl in pre-PCI serum creatinine at 48 h to 72 h post PCI)** | | | | | | | | | | | | | | | |
| **Brown, et al** | 10 | 99.2 | 3.5 | 24 (1.9) | 521 (41.7) | 39.8 | 20.9 | 0.699 (0.673-0.724) | 0.946 | 10.539 | | 226.6 | 16.19; 0.040 | | 0.535 |
| **Tsai, et al** | 20 | 99.2 | 3.8 | 24 (1.9) | 476 (38.2) | 36.3 | 19.1 | 0.633 (0.606 –0.660) | 0.219 | 3.331 | | 233.8 | 20.01;0.006 | | 0.839 |
| **Gurm, et al** | 0.7 | 97.5 | 1.1 | 24 (1.9) | 739 (59.3) | 57.4 | 30.2 | 0.513 (0.484 –0.541) | 0.208 | 1.205 | | 235.9 | 26.6; 0.001 | | 0.090 |
| **Caspi, et al** | 0 | 99.3 | 3 | 24 (1.9) | 670 (53.7) | 51.8 | 27.3 | 0.651 (0.624-0.678) | 0.731 | 7.113 | | 230 | 9.47; 0.05 | | 0.119 |
| **Victor, et al** | 0 | 98.9 | 2.2 | 24 (1.9) | 889 (71.3) | 69.4 | 36.5 | 0.603 (0.485-0.721) | 1.385 | 7.846 | | 229.3 | 1.59; 0.451 | | 0.766 |
| **Maioli, et al** | 1 | 99.7 | 3.3 | 24 (1.9) | 663 (53.2) | 51.3 | 27 | 0.735 (0.709-0.759) | 1.332 | 14.953 | | 222.2 | 4.15; 0.246 | | 0.868 |
| **Marenzi, et al** | 1 | 98.7 | 2.5 | 24 (1.9) | 650 (52.1) | 50.2 | 26.4 | 0.574 (0.466-0.682) | 0.115 | 1.592 | | 235.6 | 1.07; 0.586 | | 0.999 |
| **Liu, et al** | 0 | 98.6 | 3.3 | 24 (1.9) | 367 (29.4) | 27.5 | 14.5 | 0.604 (0.485-0.723) | 0.183 | 2.509 | | 234.6 | 1.45; 0.227 | | 0.907 |
| **Gao, et al** | 4 | 100 | 2.6 | 24 (1.9) | 929 (74.5) | 72.6 | 38.2 | 0.595 (0.504-0.686) | 0.128 | 2.104 | | 235.1 | 20.69; 0.004 | | 0.607 |
| **Fu, et al** | 6 | 98.7 | 3.1 | 24 (1.9) | 458 (36.8) | 34.9 | 18.4 | 0.626 (0.521-0.731) | 0.241 | 3.497 | | 233.7 | 13.41; 0.063 | | 0.820 |
| **Chen, et al** | 6 | 98.9 | 2.3 | 24 (1.9) | 874 (70.1) | 68.2 | 35.9 | 0.546 (0.444-0.648) | 0.299 | 0.456 | | 236.7 | 14.13; 0.078 | | 0.446 |
| **Ghani, et al** | 2 | 98.3 | 3.6 | 24 (1.9) | 169 (13.6) | 11.7 | 6.2 | 0.530 (0.407-0.653) | 0.172 | 0.220 | | 236.9 | 1.99; 0.158 | | 0.792 |
| **Bartholomew, et al.** | 2 | 98.7 | 2.8 | 24 (1.9) | 497 (39.9) | 38 | 20 | 0.595 (0.473–0.717) | 0.331 | 3.367 | | 233.8 | 3.27; 0.514 | | 0.727 |
| **Mehran, et al** | 7 | 99.3 | 2.9 | 24 (1.9) | 689 (55.2) | 53.3 | 28.1 | 0.604 (0.509-0.699) | 0.096 | 1.273 | | 235.9 | 12.98; 0.072 | | 0.562 |
| **Tziakas, et al** | 2 | 98.3 | 3 | 24 (1.9) | 201 (16.1) | 14.2 | 7.5 | 0.552 (0.43 –0.670) | 0.209 | 1.882 | | 235.3 | 1.51; 0.679 | | 0.956 |
| **Ando et al** | 1.3 | 98.8 | 4.8 | 24 (1.9) | 249 (25) | 18.1 | 9.5 | 0.616 (0.484-0.749) | 0.035 | 13.981 | | 223.2 | 20.48;0.009 | | 0.689 |
| **McCullough et al** | 96.8 | 99.5 | 2.5 | 24 (1.9) | 374 (30) | 28.1 | 14.8 | 0.579 (0.469 –0.688) | 0.001 | 0.057 | | 237.1 | 5.68;0.683 | | 0.471 |

CI-AKI, contrast induced nephropathy; H-L, Hosmer-Lemeshow; -2LL, -2 log likelihood

**Statistical Analysis**

We determined the diagnostic accuracy (model discrimination) of the under-investigation risk models by calculating the positive, and negative predictive values as well as the concordance statistic (C-statistic) using the receiver-operating characteristic (ROC) curve analysis. For each risk score, we reported the number of expected events specific to the cut-off value of the score based to ROC curve analysis (cut-off points were calculated using the best Youden index, defined as sensitivity + specificity–1). We reported the absolute difference between the predicted and the observed events as well as the discordance ratio defined as ([{expected percentage − observed percentage}/observed percentage]) and discrimination slope. The discrimination slope was calculated as the absolute difference in the average predictions for those with and without the outcome. Furthermore, model fit was assessed by the overall chi-square and the - 2Log likelihood values. Finally, model calibration was measured by the Hosmer-Lemeshow statistic and the calibration slope.

According to power analysis and a hypothesized 1% incidence of AKI, 1,000 patients would be needed for the present study to have an at least 90% statistical power to detect a two-tailed AUC of > 0.800.

Venn diagrams are the most commonly used method to compare and visualize datasets of diverse groups (1). Venn diagrams typically consist of intersecting circles or ellipses, which represent the different data set groups, and the overlap and separation between the circles allows for a visual representation of the logical relationships between different data sets (1).. For the construction of Venn diagrams, we used Bio-Venn online software (2).

For the forced model, we used the risk model with the highest c-statistic regarding the prediction of CI-AKI and incorporated each at a time, all the different variables that were used in other models and calculated the c-statistic of the new model. We then forced in the model all the variables that increased the c-statistic of the initial model. We finally assessed the additive predictive value of the forced model using net reclassification improvement analysis as described by Pencina (3).

The IBM PASW-SPSS Statistics 22.0 statistical software package (SPSS Inc., Chicago, Illinois) was used for all calculations with an exception of area under the curve (AUC) comparison for which MedCalc 19.2 Statistical Software (MedCalc Software, Mariakerke, Belgium) was used.

**References**

(1). Kestler HA, Müller A, Gress TM, Buchholz M. Generalized Venn diagrams: a new method of visualizing complex genetic set relations. Bioinformatics 2005;21:1592–95.

(2). Hulsen T, de Vlieg J, Alkema W BioVenn - a web application for the comparison and visualization of biological lists using area-proportional Venn diagrams. BMC Genomics 2008;9:488

(3). Pencina, M.J., D' Agostino, R.B., Sr, D' Agostino, R.B., Jr and Vasan, R.S. Evaluating the added predictive ability of a new marker: From area under the ROC curve to reclassification and beyond. Statist. Med. 2008;27:157-72.

**Supplementary Table 4. Upscaling of the most predictive model for CI-AKI by force analysis using all variables -each at a time- used in the remaining predictive models.**

|  | **C-statistic** | **P value vs. baseline model** | **-2LL** | **Overall Chi-square** |
| --- | --- | --- | --- | --- |
| **Liberal CI-AKI criterion (an increase of ≥25% or ≥0.5 mg/dl in pre-PCI serum creatinine at 48 h to 72 h post PCI)** | | | | |
| Maioli et al | 0.583 (0.555 – 0.610) |  |  |  |
| + Procedure Urgent/emergent | 0.506 (0.478 – 0.534) | 0.005* | 1117.6 | 0.144 |
| + Contrast volume | 0.538 (0.510 – 0.566) | 0.126 | 1116 | 1.775 |
| + Anemia | 0.509 (0.480 – 0.537) | 0.008* | 1117.5 | 0.226 |
| + Hypotension | 0.512 (0.484 – 0.540) | 0.001* | 1110.5 | 7.234 |
| + Multivessel PCI | 0.510 (0.482 – 0.538) | 0.003* | 1117.1 | 0.653 |
| + Shock | 0.510 (0.482 – 0.538) | 0.006* | 1103.3 | 14.470 |
| + Anterior Myocardial Infarction | 0.514 (0.486 – 0.542) | 0.004* | 1116.3 | 1.416 |
| + Peripheral arterial disease | 0.508 (0.479 – 0.536) | 0.005* | 1116.3 | 1.439 |
| + Hypertension | 0.540 (0.512 – 0.568) | 0.111 | 1113.1 | 4.634 |
| + Metformin use | 0.502 (0.474 to 0.530) | <0.001* | 1117.8 | 0.018 |
| + IABP | 0.501 (0.473 – 0.530) | <0.001* | 1116.7 | 1.085 |
| + Previous Myocardial Infarction | 0.540 (0.511 - 0.567) | 0.120 | 1113.4 | 4.379 |
| + Previous PCI procedure <72h | 0.502 (0.474 – 0.530) | <0.001* | 1117.4 | 0.375 |
| + Albuminuria | 0.501 (0.473 - 0.529) | 0.004* | 1117.8 | 0.018 |
| + Diabetic Microangiopathy | 0.524 (0.496 – 0.552) | 0.006* | 1112.9 | 4.884 |
| + Gender | 0.502 (0.474 – 0.530) | 0.001* | 1117.8 | 0.018 |
| + BMI | 0.503 (0.476 – 0.531) | <0.001* | 1117.4 | 0.364 |
| + LV Ejection fraction | 0.535 (0.507 – 0.563) | 0.037* | 1110.7 | 7.046 |
| + Cardiac arrest | 0.502 (0.471 – 0.527) | <0.001* | 1116.7 | 1.081 |
| + Smoking | 0.539 (0.511 – 0.567) | 0.165 | 1108.6 | 9.232 |
| + Stroke | 0.512 (0.484 – 0.540) | 0.004* | 1116.3 | 1.414 |
| + CAD presentation / PCI indication | 0.540 (0.511 – 0.567) | 0.120 | 1113.4 | 4.379 |
| + Time to reperfusion | 0.538 (0.510 – 0.566) | 0.113 | 1103.2 | 14.619 |
| + Killip class | 0.540 (0.512 – 0.568) | 0.096 | 1106.4 | 11.362 |
| + Diuretic Therapy | 0.524 (0.495 – 0.552) | 0.024* | 1115.7 | 2.073 |
| + HDL | 0.506 (0.478 – 0.534) | 0.010* | 1116.6 | 0.045 |
| + Hemoglobin | 0.550 (0.521 – 0.578) | 0.249 | 1111.9 | 5.797 |
| + CK-MB | 0.504 (0.477 – 0.533) | 0.002* | 1117.2 | 0.647 |
| + Troponin T/I | 0.502 (0.474 – 0.530) | <0.001* | 1117.4 | 0.371 |
| + GFR | 0.564 (0.536 – 0.592) | 0.513 | 1106.1 | 11.279 |
| **Strict CI-AKI criterion (an increase of ≥0.5 mg/dl in pre-PCI serum creatinine at 48 h to 72 h post PCI)** | | | | |
| Maioli et al | 0.735 (0.709-0.759) | n/a | 222.2 | 14.953 |
| + Procedure Urgent/emergent | 0.779 (0.708 – 0.850) | 0.054 | 219.4 | 17.751 |
| + Contrast volume | 0.744 (0.719 - 0.768) | 0.506 | 221.5 | 15.710 |
| + Anemia | 0.737 (0.712 – 0.762) | 0.827 | 221.1 | 15.052 |
| + Hypotension | 0.734 (0.708 – 0.758) | 0.279 | 219.7 | 17.452 |
| + Multivessel PCI | 0.753 (0.728 - 0.777) | <0.001* | 221.2 | 15.940 |
| + Shock | 0.742 (0.717-0.766) | 0.173 | 214.6 | 22.541 |
| + Anterior Myocardial Infarction | 0.741 (0.716 – 0.765) | 0.485 | 221.9 | 15.222 |
| + Peripheral arterial disease | 0.744 (0719 – 0.768) | 0.002* | 220.4 | 16.737 |
| + Hypertension | 0.742 (0.717 – 0.766) | 0.581 | 222.1 | 15.032 |
| + Metformin use | 0.755 (0.730 – 0.779) | 0.034* | 221.6 | 15.509 |
| + IABP | 0.737 (0.712 – 0.761) | 0.088 | 221.9 | 15.206 |
| + Previous Myocardial Infarction | 0.726 (0.700 – 0.751) | 0.442 | 221.6 | 15.532 |
| + Previous PCI procedure <72h | 0.739 (0.714 – 0.763) | 0.008* | 221.7 | 15.485 |
| + Albuminuria | 0.768 (0.743 - 0.791) | 0.388 | 216.4 | 20.761 |
| + Diabetic Microangiopathy | 0.739 (0.714 – 0.763) | 0.764 | 220.8 | 16.354 |
| + Gender | 0.739 (0.714 – 0.764) | 0.129 | 221.8 | 15.353 |
| + BMI | 0.727 (0.703 – 0.748) | 0.456 | 221.9 | 15.305 |
| + LV Ejection fraction | 0.739 (0.713 – 0.763) | 0.987 | 221.7 | 15.424 |
| + Cardiac arrest | 0.737 (0.711 - 0.760) | 0.769 | 222 | 15.125 |
| + Smoking | 0.723 (0.698 – 0.748) | 0.707 | 217.5 | 19.638 |
| + Stroke | 0.758 (0.732 – 0.781) | 0.135 | 221.8 | 15.535 |
| + CAD presentation / PCI indication | 0.726 (0.700 - 0.751) | 0.442 | 221.6 | 15.532 |
| + Time to reperfusion | 0.759 (0.734 – 0.783) | 0.132 | 215.9 | 21.276 |
| + Killip class | 0.753 (0.728 – 0.777) | 0.509 | 212.3 | 24.834 |
| + Diuretic Therapy | 0.721 (0.695 – 0.746) | 0.292 | 222 | 15.133 |
| + HDL | 0.757 (0.733 – 0.781) | 0.055 | 221.9 | 15.150 |
| + Hemoglobin | 0.746 (0.721 – 0.770) | 0.519 | 221.5 | 15.640 |
| + CK-MB | 0.740 (0.715 – 0.764) | 0.579 | 222.1 | 15.031 |
| + Troponin T/I | 0.728 (0.702 - 0.754) | 0.448 | 221.6 | 15.511 |
| + GFR | 0.723 (0.697-0.748) | 0.394 | 222 | 15.103 |

Variable Race was not assessed as having same value among all study participants

* Statistical significance (p value < 0.05)

BMI, body mass index; CAD, coronary artery disease; CI-AKI, contrast induced acute kidney injury; CK-MB, creatine kinase isoenzyme-MB; GFR, glomerular filtration rate; IABP, intra-aortic balloon pump; HDL, high density lipoprotein; LVEF, left ventricular; MI, myocardial infarction; PCI, percutaneous coronary intervention

**Exploratory Analysis**

**Supplementary Table 5. Predictive accuracy of CI-AKI risk score models between patients with acute coronary syndrome vs. patients with stable coronary artery disease**

|  | **Acute Coronary Syndrome**  **Patients** | | **Stable Coronary Artery Disease Patients** | |
| --- | --- | --- | --- | --- |
|  | **C-statistic** | **95% CI** | **C-statistic** | **95% CI** |
| **Liberal CI-AKI criterion (an increase of ≥25% or ≥0.5 mg/dl in pre-PCI serum creatinine at 48 h to 72 h post PCI)** | | | | |
| Mehran et al. | 0.489 | 0.433 – 0.544 | 0.574 | 0.509 – 0.638 |
| Bartholomew et al | 0.444 | 0.384 – 0.504 | 0.570 | 0.511 – 0.630 |
| Tziakas et al | 0.492 | 0.432 – 0.553 | 0.491 | 0.430 – 0.551 |
| Ghani et al | 0.527 | 0.465 – 0.589 | 0.480 | 0.419 – 0.542 |
| Chen et al | 0.535 | 0.479 – 0.591 | 0.471 | 0.408 – 0.534 |
| Fu et al | 0.513 | 0.455 – 0.572 | 0.512 | 0.450 – 0.573 |
| Gao et al | 0.480 | 0.425 – 0.536 | 0.520 | 0.458 – 0.582 |
| Liu et al | 0.543 | 0.484 – 0.603 | 0.502 | 0.440 – 0.565 |
| Maioli et al | 0.580 | 0.520 – 0.640 | 0.584 | 0.517 – 0.650 |
| Marenzi et al | 0.536 | 0.476 – 0.596 | 0.567 | 0.504 – 0.631 |
| Victor et al | 0.523 | 0.463 – 0.583 | 0.559 | 0.496 – 0.621 |
| Caspi et al | 0.559 | 0.500 – 0.618 | 0.492 | 0.431 – 0.552 |
| Gurm et al | 0.487 | 0.426 – 0.549 | 0.443 | 0.379 – 0.507 |
| Tsai et al | 0.542 | 0.485 – 0.600 | 0.480 | 0.419 – 0.541 |
| Brown et al | 0.529 | 0.472 – 0.587 | 0.521 | 0.457 – 0.585 |
| McCullough et al | 0.569 | 0.513 – 0.625 | 0.591 | 0.530 – 0.653 |
| Ando et al | 0.575 | 0.516 – 0.635 | 0.497 | 0.434 – 0.561 |
| **Strict CI-AKI criterion (an increase of ≥0.5 mg/dl in pre-PCI serum creatinine at 48 h to 72 h post PCI)** | | | | |
| Mehran et al. | 0.520 | 0.381 - 0.658 | 0.694 | 0.583 - 0.805 |
| Bartholomew et al | 0.583 | 0.381 - 0.785 | 0.638 | 0.499 - 0.777 |
| Tziakas et al | 0.562 | 0.385 - 0.738 | 0.520 | 0.359 - 0.680 |
| Ghani et al | 0.489 | 0.304 - 0.674 | 0.558 | 0.403 - 0.713 |
| Chen et al | 0.546 | 0.401 - 0.690 | 0.645 | 0.514 - 0.776 |
| Fu et al | 0.573 | 0.412 - 0.734 | 0.708 | 0.579 - 0.837 |
| Gao et al | 0.501 | 0.368 - 0.635 | 0.724 | 0.606 - 0.842 |
| Liu et al | 0.501 | 0.341 - 0.661 | 0.709 | 0.551 - 0.866 |
| Maioli et al | 0.659 | 0.525 - 0.793 | 0.816 | 0.714 - 0.917 |
| Marenzi et al | 0.472 | 0.329 - 0.614 | 0.686 | 0.543 - 0.828 |
| Victor et al | 0.540 | 0.392 - 0.687 | 0.671 | 0.497 - 0.845 |
| Caspi et al | 0.682 | 0.536 - 0.828 | 0.610 | 0.472 - 0.748 |
| Gurm et al | 0.447 | 0.252 - 0.642 | 0.586 | 0.425 - 0.746 |
| Tsai et al | 0.517 | 0.346 - 0.688 | 0.804 | 0.744 - 0.865 |
| Brown et al | 0.673 | 0.518 - 0.827 | 0.758 | 0.653 - 0.864 |
| McCullough et al | 0.433 | 0.258 - 0.607 | 0.402 | 0.270 - 0.535 |
| Ando et al | 0.490 | 0.300 - 0.680 | 0.744 | 0.591 - 0.896 |

CI-AKI, contrast induced nephropathy; CI, confidence intervals

**Supplementary Table 6.** Predictive accuracy of CI-AKI risk score models using an intermediate criterion (an increase of ≥0.3 mg/dl in pre-PCI serum creatinine at 48 h to 72 h post PCI)

| **Intermmediate CI-AKI criterion (an increase of ≥0.3 mg/dl in pre-PCI serum creatinine at 48 h to 72 h post PCI)** | | | | |
| --- | --- | --- | --- | --- |
|  | **C-statistic** | **95% CI** | **Overall Chi-square** | **-2LL** |
| Mehran et al. | 0.610 | 0.559 - 0.660 | 6.152 | 704.1 |
| Bartholomew et al | 0.536 | 0.481 - 0.592 | 1.268 | 709.7 |
| Tziakas et al | 0.587 | 0.530 - 0.643 | 7.828 | 703.1 |
| Ghani et al | 0.534 | 0.476 - 0.592 | 1.021 | 709.9 |
| Chen et al | 0.518 | 0.458 - 0.578 | 0.672 | 710.3 |
| Fu et al | 0.587 | 0.530 - 0.643 | 6.832 | 704.1 |
| Gao et al | 0.540 | 0.481 - 0.599 | 1.799 | 709.2 |
| Liu et al | 0.561 | 0.502 - 0.621 | 3.441 | 707.5 |
| Maioli et al | 0.641 | 0.581 - 0.701 | 33.085 | 677.9 |
| Marenzi et al | 0.598 | 0.538 - 0.657 | 16.134 | 694.8 |
| Victor et al | 0.623 | 0.562 - 0.684 | 22.185 | 688.8 |
| Caspi et al | 0.573 | 0.517 - 0.629 | 5.493 | 705.5 |
| Gurm et al | 0.461 | 0.401 - 0.520 | 0.045 | 710.9 |
| Tsai et al | 0.538 | 0.479 - 0.597 | 1.112 | 709.8 |
| Brown et al | 0.585 | 0.526 - 0.644 | 8.063 | 702.9 |
| McCullough et al | 0.491 | 0.428 - 0.554 | 0.107 | 710.9 |
| Ando et al | 0.542 | 0.479 - 0.605 | 6.415 | 704.5 |

CI-AKI, contrast induced nephropathy; CI, confidence intervals; -2LL, -2 log likelihood

**SUPPLEMENTARY FIGURES**

**Supplementary Figure1**

**
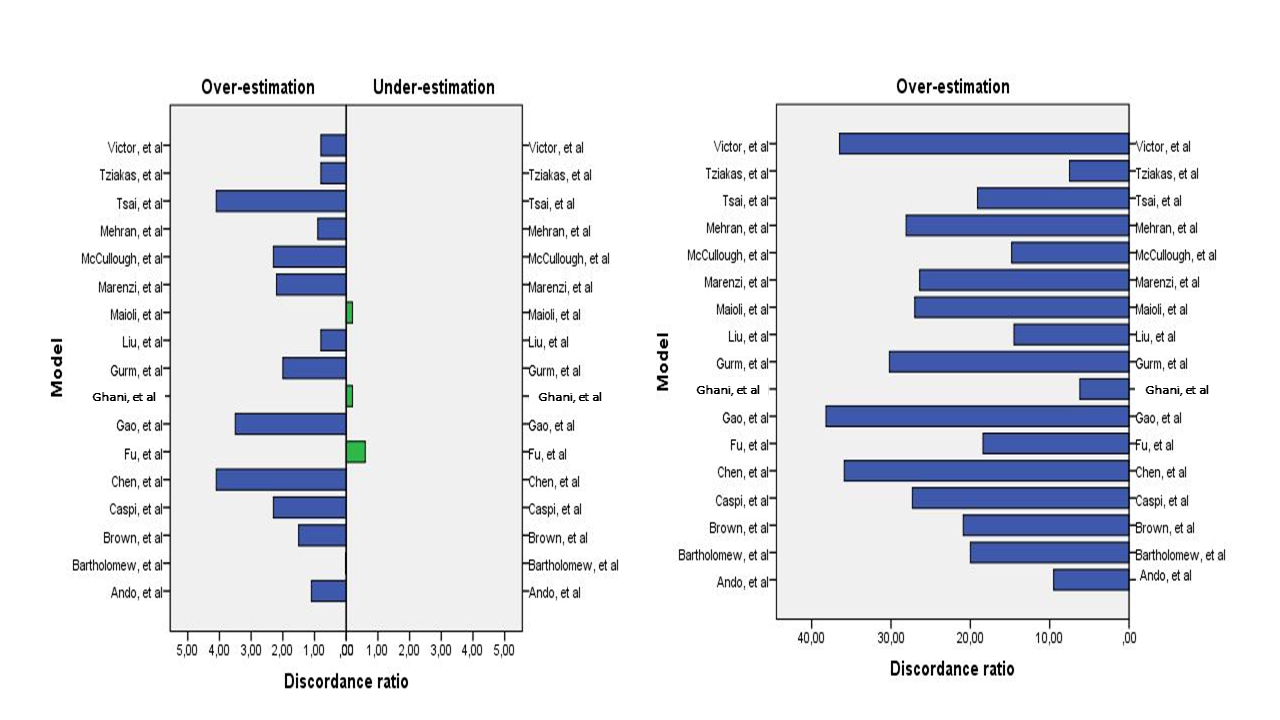
**

**Supplementary Figure 1.** Discordance ratio values of under investigation models for contrast-induced acute kidney injury in PCI patients.

A; Liberal CI-AKI criterion (an increase of ≥25% or ≥0.5 mg/dl in pre-PCI serum creatinine at 48 h to 72 h post PCI)

B; Strict CI-AKI criterion (an increase of ≥0.5 mg/dl in pre-PCI serum creatinine at 48 h to 72 h post PCI)

Blue bars; over-estimation

Green bars; under-estimation

CI-AKI, contrast-induced acute kidney injury; h, hours; PCI, percutaneous coronary intervention

**Supplementary Figure 2**

**
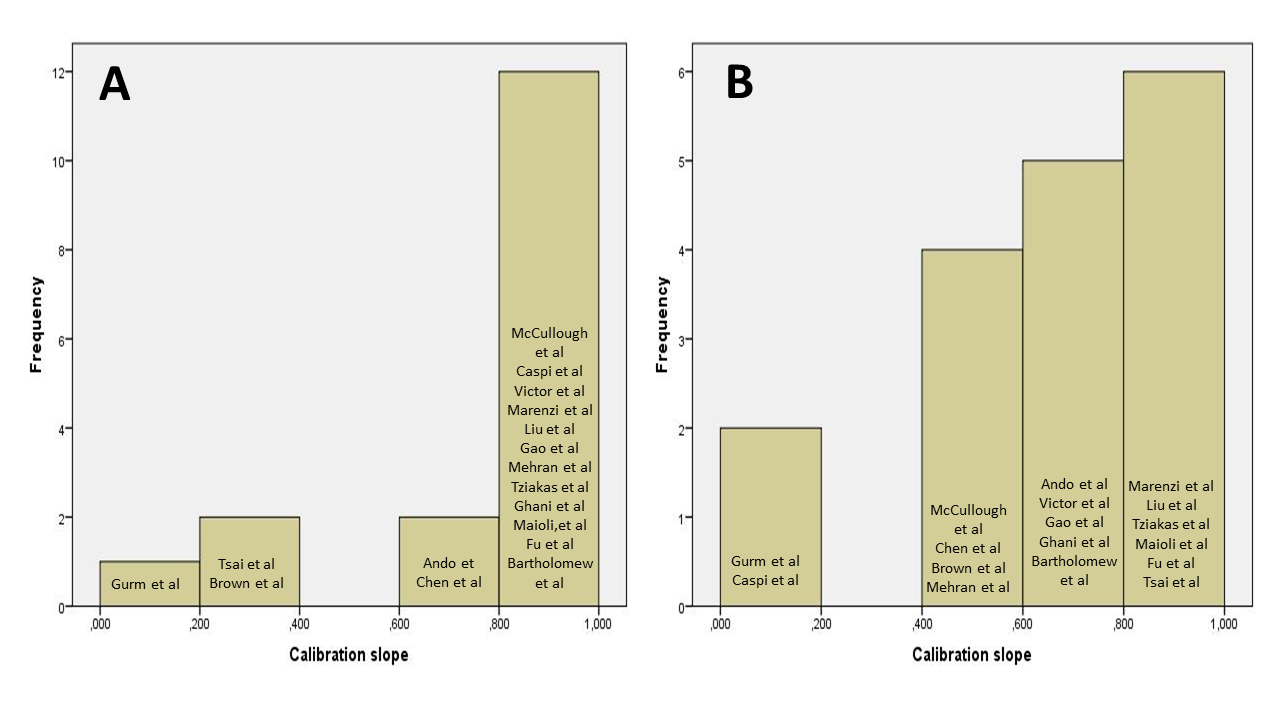
**

**Supplementary Figure 2.** Distribution of calibration slope of under investigation models for CI-AKI in PCI patients.

A; Liberal CI-AKI criterion (an increase of ≥25% or ≥0.5 mg/dl in pre-PCI serum creatinine at 48 h to 72 h post PCI)

B; Strict CI-AKI criterion (an increase of ≥0.5 mg/dl in pre-PCI serum creatinine at 48 h to 72 h post PCI)

CI-AKI, contrast-induced acute kidney injury; h, hours; PCI, percutaneous coronary intervention
